# Supplementary material for: Pharmacological Validation of Long-Term Treatment with Antiretroviral Drugs in a Model of SIV-Infected Non-Human Primates
Source: MDPI journal article supplement (doi:10.3390/pharmaceutics14112282), 2022-10-25
Supplement: s1 [file s1]

# Pharmacological validation of long-term treatment with antiretroviral drugs in a model of SIV-infected non-human primates

Thibaut Gelé, Hélène Gouget, Nathalie Dereuddre-Bosquet, Valérie Furlan, Roger Le Grand, Olivier Lambotte, Delphine Desjardins and Aurélie Barrail-Tran

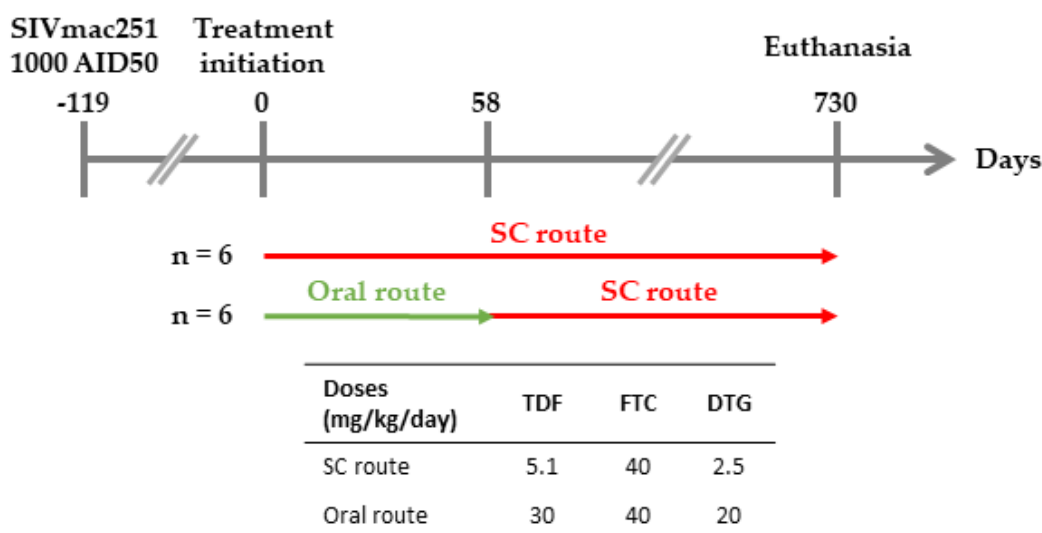

**Figure S1.** Repeated-dose study design. Abbreviations: AID50: 50% animal infectious doses, SC: subcutaneous, TDF: tenofovir disoproxil fumarate, FTC: emtricitabine, DTG: dolutegravir.

**Table S1.** Virological follow-up.

|                | Plasma viral load<br>(log <sub>10</sub> copies/mL) | Percentage of NHPs with undetectable plasma viral load<br>(threshold = 40 copies/mL = 1.6 log <sub>10</sub> copies/mL) |         |          |                  |
|----------------|----------------------------------------------------|------------------------------------------------------------------------------------------------------------------------|---------|----------|------------------|
|                | Baseline                                           | Month 2                                                                                                                | Month 6 | Month 12 | End of treatment |
| PO (n = 6)     | 4.3 (4.6)                                          | 83 %                                                                                                                   | /       | /        | /                |
| SC (n = 6)     | 4.4 (4.9)                                          | 100 %                                                                                                                  | /       | /        | /                |
| Total (n = 12) | 4.3 (4.8)                                          | 92 %                                                                                                                   | 100 %   | 100 %    | 100 %            |

Variables are expressed as medians and interquartile ranges (IQR). Abbreviations: PO: oral route, SC: subcutaneous route, IV: intravenous route, NHP: non-human primate.
